# Supplementary material for: SH3YL1 cooperates with ESCRT-I in the sorting and degradation of the EGF receptor
Source: Oxford University Press journal article supplement (doi:10.1242/jcs.229179), 2019-09-06
Supplement: jcs229179supp.pdf [file jcs229179supp.pdf]

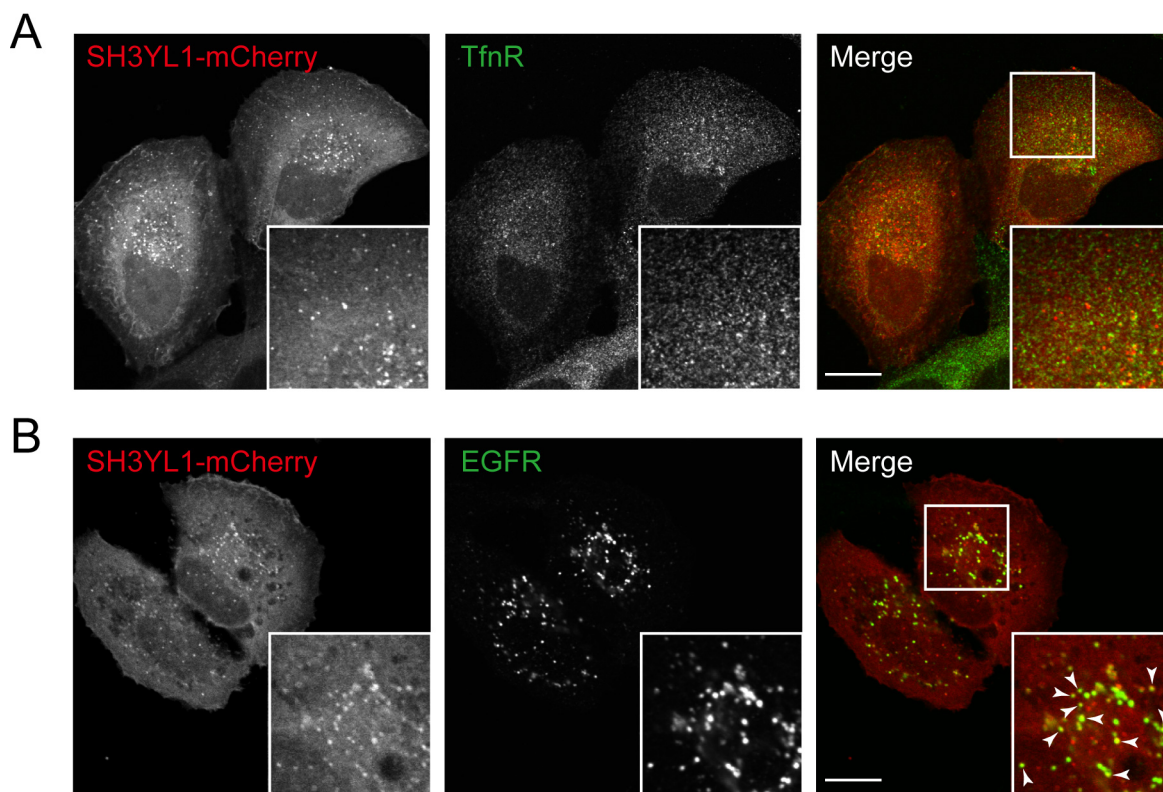

**Fig. S1. Localization of SH3YL1 with endosomal markers.** (A) HeLa cells stably expressing SH3YL1-mCherry (red) were immunostained with anti-transferrin receptor (TfnR) antibody (green). (B) SH3YL1-mCherry (red) stable HeLa cells were stimulated with 50 ng/ml EGF for 30 min and fixed. The localization of EGFR receptor was assessed by immunostaining with anti-EGFR antibody (green). The boxed region is magnified in inset. Arrowheads indicate colocalizations. Images are representative of three independent experiments. Scale bars, 10  $\mu$ m.

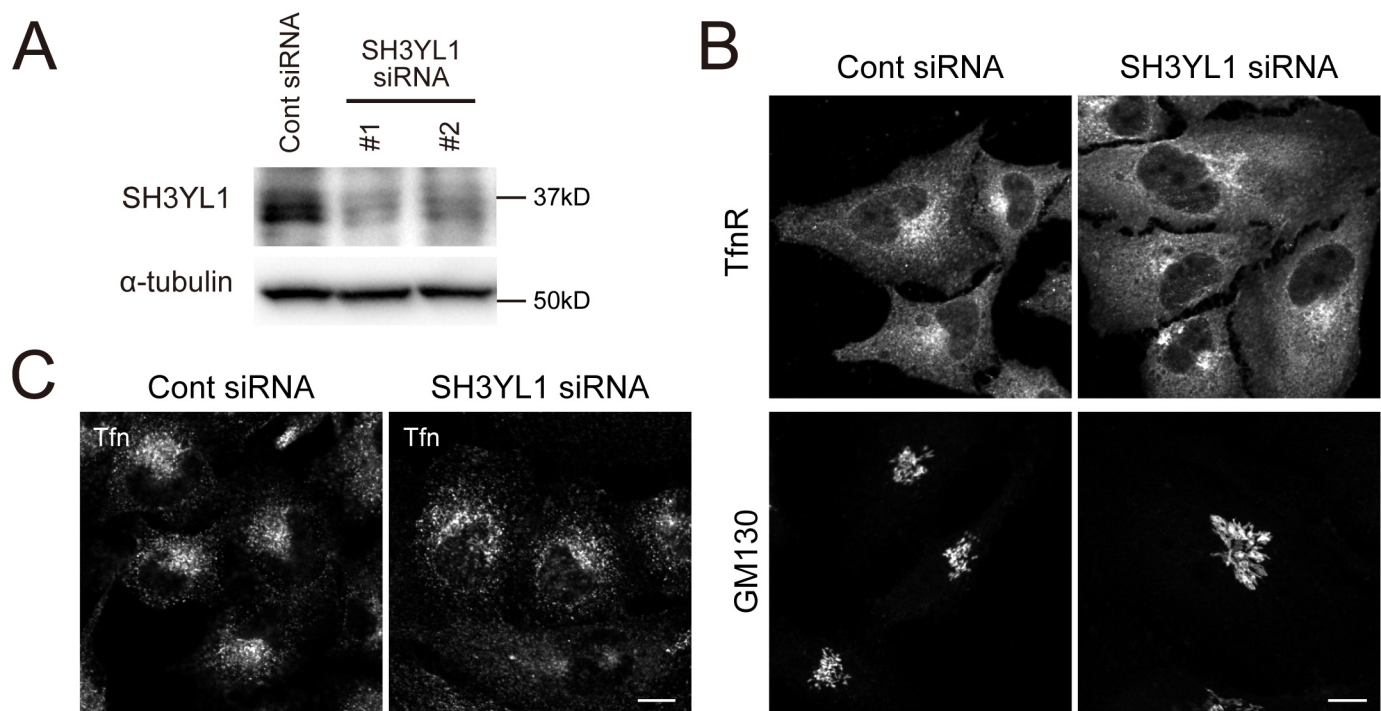

**Fig. S2. Depletion of SH3YL1 does not affect transferrin uptake.** (A) HeLa cells were treated with control or SH3YL1-specific siRNAs for 72 h, and cell lysates were detected by immunoblotting. (B) SH3YL1 knockdown cells (control or SH3YL1#2) were stained with anti-transferrin receptor (TfnR) or anti-GM130 antibodies. Images are representative of three independent experiments. Scale bars, 10  $\mu$ m. (C) HeLa cells treated with siRNAs (control or SH3YL1#2) were incubated with 1  $\mu$ g/ml Alexa Fluor 568-conjugated transferrin (Tfn) for 5 min at 37°C and then chased in serum-free medium without ligand for 10 min. Images are representative of three independent experiments. Scale bars, 10  $\mu$ m.

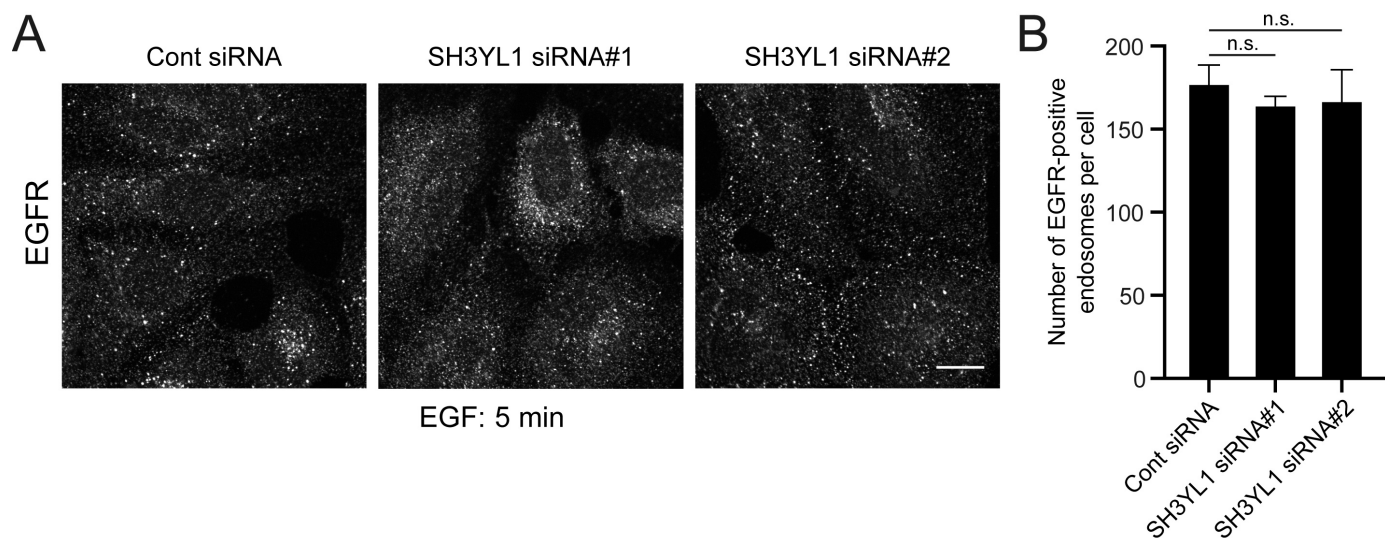

**Fig. S3. Depletion of SH3YL1 does not affect EGF uptake.** (A) HeLa cells were stimulated with 50 ng/ml EGF for 5 min, fixed, and then immunostained with anti-EGFR antibody. Images are representative of three independent experiments. Scale bars, 10  $\mu$ m. (B) EGFR-positive endosomes were counted and presented with the mean ( $\pm$ SEM) of three independent experiments with at least 10 cells per experiment. n.s., not significant (Tukey's multiple comparison test).

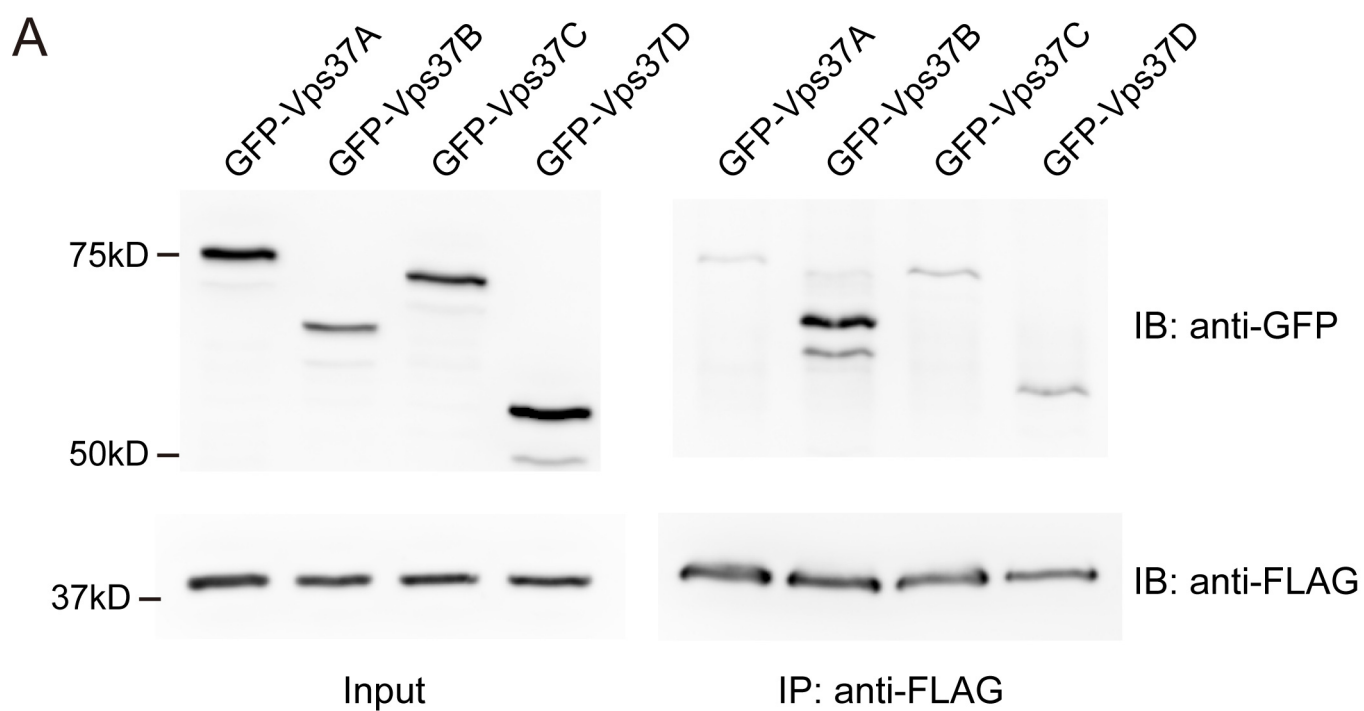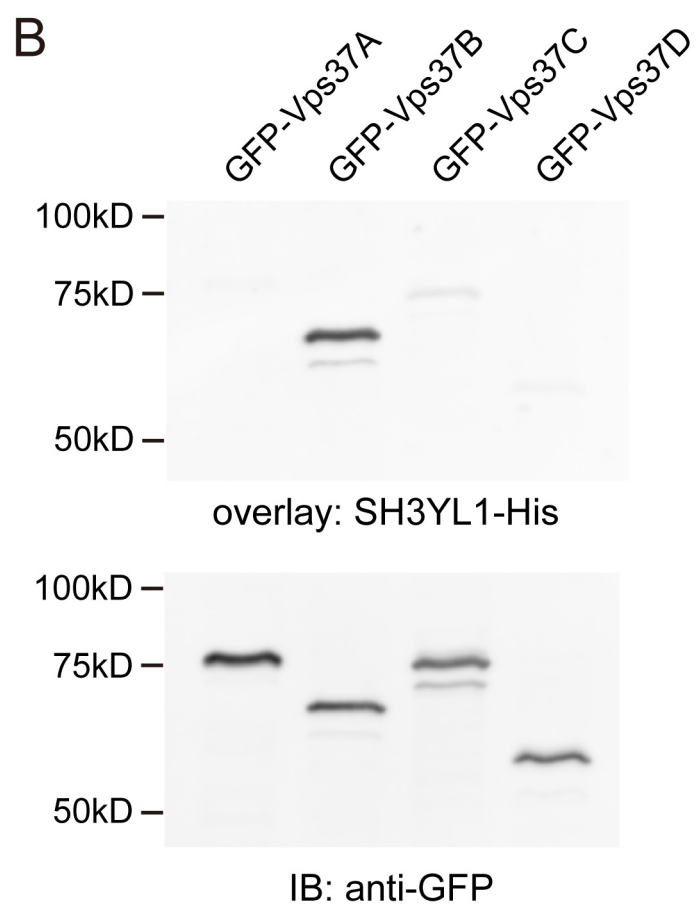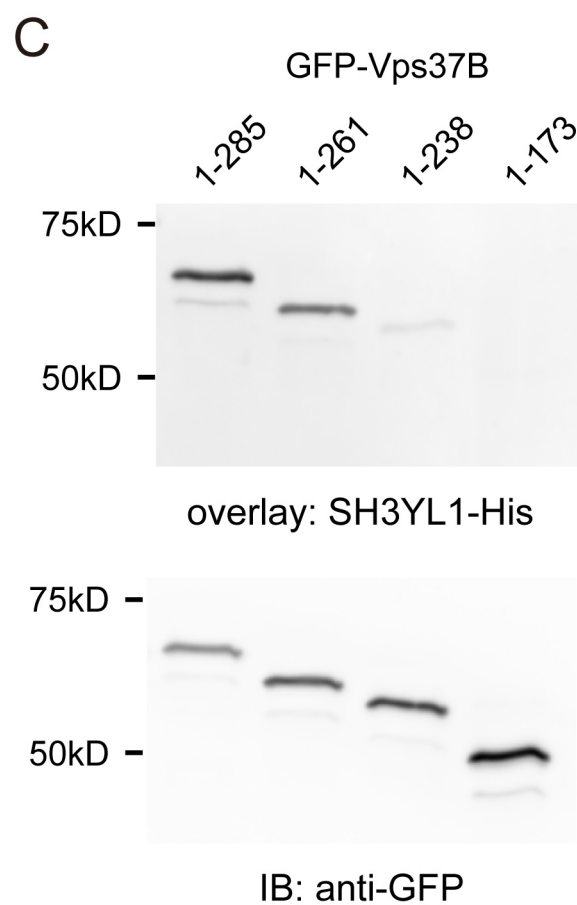

**Fig. S4. SH3YL1 binds almost exclusively to Vps37B.** (A) Indicated constructs were expressed in 293FT cells together with FLAG-SH3YL1 for 48 h, and cell lysates were prepared. SH3YL1 proteins were immunoprecipitated with anti-FLAG antibody and then analyzed by immunoblotting with anti-GFP antibody. Input; cell lysate. Data are representative of three independent experiments. (B) Indicated constructs of GFP-Vps37 proteins were expressed in 293FT cells and immunoprecipitated with anti-GFP antibody. Immunoprecipitates were transferred onto PVDF membrane after SDS-PAGE and then overlaid by SH3YL1-His recombinant protein (upper). GFP-Vps37 proteins were visualized by western blotting with anti-GFP antibody (lower). Data are representative of three independent experiments. (C) SH3YL1-Vps37B interaction requires “PxLPxR” motifs in Vps37B. Indicated constructs of GFP-Vps37B were subjected to an overlay assay as in (B). Data are representative of three independent experiments.

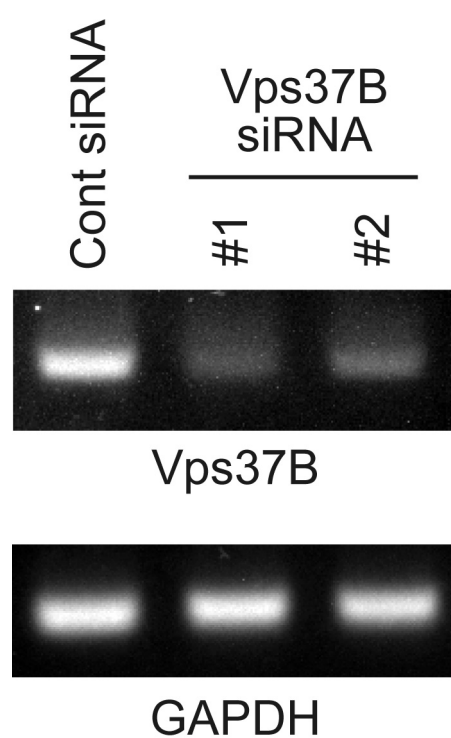

**Fig. S5. Knockdown of Vps37B in HeLa cells.** HeLa cells were treated with control or Vps37B-specific siRNAs for 72 h. Knockdown levels were assessed by RT-PCR by specific primer sets for human Vps37B (upper) or GAPDH (lower). Data are representative of three independent experiments.



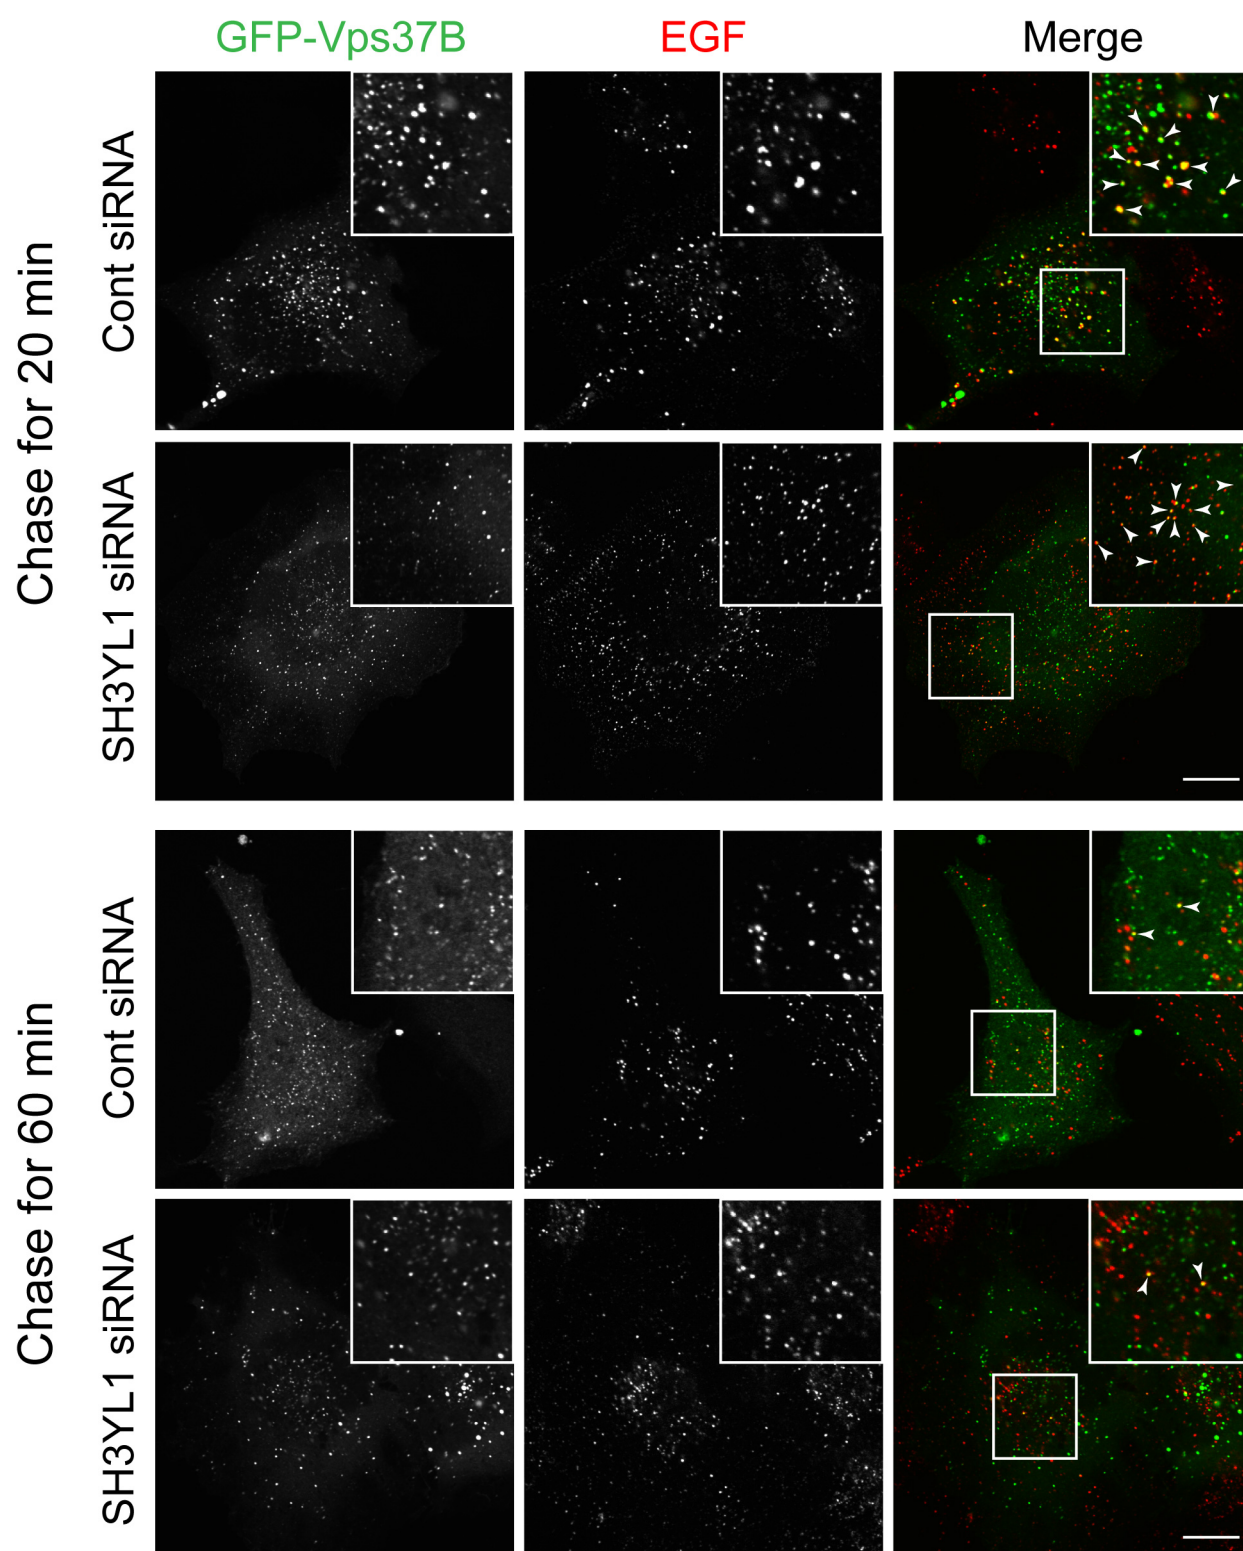

**Fig. S6. Loss of SH3YL1 does not affect EGF trafficking via Vps37B-positive**

**endosomes.** (A) HeLa cells co-expressing GFP-Vps37B and mCherry-Tsg101 were treated with siRNAs (control or SH3YL1#2) for 72 h, incubated with 0.1  $\mu$ g/ml Alexa647-EGF for 5 min at 37°C and then chased in serum-free medium without EGF for 20 and 60 min. Boxed regions are magnified in insets. Arrowheads indicate colocalization of Alexa647-EGF (red) with GFP-Vps37B (green). Images are representative of three independent experiments. Scale bars, 10  $\mu$ m. Arrowheads indicate colocalizations with Pearson correlation coefficients of  $0.44\pm0.05$  (cont siRNA, 20 min),  $0.13\pm0.08$  (cont siRNA, 60 min),  $0.29\pm0.04$  (SH3YL1 siRNA#2, 20 min), and  $0.13\pm0.02$  (SH3YL1 siRNA#2, 60 min) (mean $\pm$ SD of 10 cells).



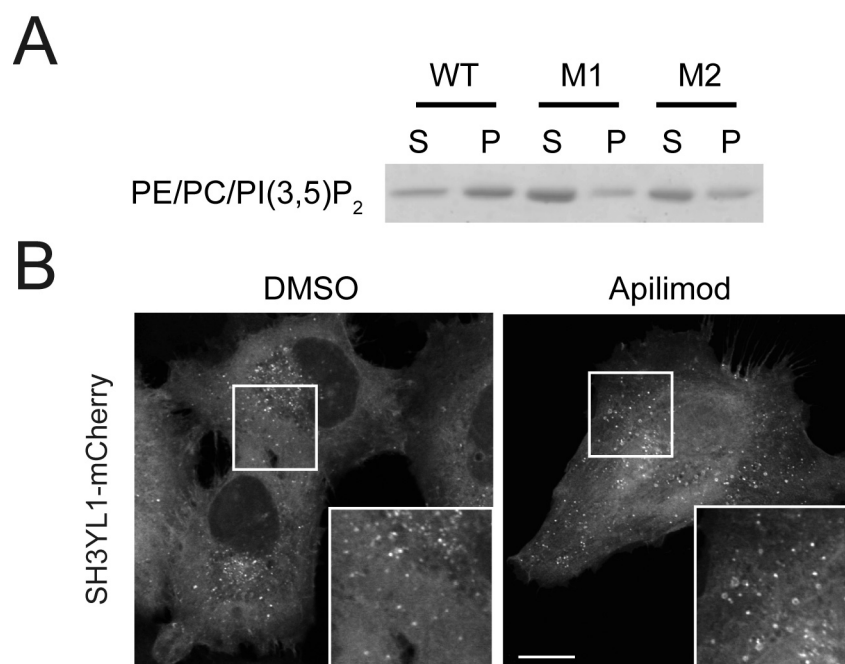

**Fig. S7. Vesicular localization of SH3YL1 is not dependent on PI(3,5)P<sub>2</sub>.** (A)

Liposome co-sedimentation assay using PE/PC-based liposomes supplemented with 10% of PI(3,5)P<sub>2</sub> (See Materials and methods in detailed). SH3YL1 recombinant proteins wild-type (WT), amino acid substitutions of Lys<sup>14</sup>Lys<sup>15</sup> to Ala<sup>14</sup>Ala<sup>15</sup> (M1), and amino acid substitutions of Lys<sup>18</sup>Arg<sup>21</sup> to Ala<sup>18</sup>Ala<sup>21</sup> (M2) are used in this assay. Data are representative of three independent experiments. (B) HeLa cells stably expressing SH3YL1-mCherry were treated by DMSO or 1  $\mu$ M apilimod (a PIKfyve inhibitor) for 1 h. SH3YL1 is also localized at enlarged endosomes caused by the inhibition of PI(3,5)P<sub>2</sub> synthesis by PIKfyve, indicating its membrane localization is independent of PI(3,5)P<sub>2</sub>. Images are representative of three independent experiments.
